# Supplementary material for: Genetic Architecture of Palm Oil Fatty Acid Composition in Cultivated Oil Palm (Elaeis guineensis Jacq.) Compared to Its Wild Relative E. oleifera (H.B.K) Cortés
Source: PubMed Central journal article supplement (PMC4015976; doi:10.1371/journal.pone.0095412), 2014-05-09
Supplement: pone.0095412.s003.pdf [file pone.0095412.s003.pdf]

**Table S1: Summary statistics of phenotypic traits in LM2T x DA10D (n=71).**

| No.                       | Phenotypic Trait                                              | Acronym                | Estimation basis                                                                                                                                                                                                                                                          | Observations<br>without missing data | Minimum | Maximum | Mean   | Standard<br>deviation |
|---------------------------|---------------------------------------------------------------|------------------------|---------------------------------------------------------------------------------------------------------------------------------------------------------------------------------------------------------------------------------------------------------------------------|--------------------------------------|---------|---------|--------|-----------------------|
| <b>Production:</b>        |                                                               |                        | <b>Systematic</b>                                                                                                                                                                                                                                                         |                                      |         |         |        |                       |
| 1                         | Fruit variety                                                 | type                   | Morphology observation of the fruit section                                                                                                                                                                                                                               | 116                                  | -       | -       | -      | -                     |
| 2                         | Average bunch number/palm/year at 3-5 years                   | Bn3_5                  | individual observation at each harvest                                                                                                                                                                                                                                    | 71                                   | 22.3    | 35.1    | 30.0   | 2.5                   |
| 3                         | Average bunch weight at 3-5 years (kg)                        | Bwt3_5                 | calculation (Bwt3_5 = FFB3_5/Bn3_5)                                                                                                                                                                                                                                       | 71                                   | 3.7     | 6.2     | 4.7    | 0.5                   |
| 4                         | Fresh Fruit Bunch yield/palm/year at 3-5 years (kg/palm/year) | FFB3_5                 | measure at each harvest                                                                                                                                                                                                                                                   | 71                                   | 107.0   | 183.7   | 139.2  | 15.9                  |
| 5                         | Palm oil yield/palm/year at 3-5 years (ton/ha/year)           | PO3_5                  | calculation (135 productive palms/ha x FFB3_5 x IER)                                                                                                                                                                                                                      | 71                                   | 3.3     | 6.0     | 4.3    | 0.6                   |
| 6                         | Average bunch number/palm/year at 6-9 years                   | Bn6_9                  | individual observation at each harvest                                                                                                                                                                                                                                    | 71                                   | 17.2    | 25.2    | 21.8   | 2.0                   |
| 7                         | Average bunch weight at 6-9 years (kg)                        | Bwt6_9                 | calculation (Bwt6_9 = FFB6_9/Bn6_9)                                                                                                                                                                                                                                       | 71                                   | 9.1     | 15.1    | 11.3   | 1.1                   |
| 8                         | Fresh Fruit Bunch yield/palm/year at 6-9 years (kg/palm/year) | FFB6_9                 | measure at each harvest                                                                                                                                                                                                                                                   | 71                                   | 157.7   | 300.8   | 242.4  | 28.2                  |
| 9                         | Palm oil yield/palm/year at 6-9 years (ton/ha/year)           | PO6_9                  | calculation (135 productive palms/ha x FFB6_9 x IER)                                                                                                                                                                                                                      | 71                                   | 4.8     | 10.2    | 7.5    | 1.0                   |
| <b>Bunch components</b>   |                                                               |                        | <b>Measure (from 8 bunches analysed per palm)</b>                                                                                                                                                                                                                         |                                      |         |         |        |                       |
| 10                        | Average weight of the analysed bunch (kg)                     | aBwt                   | measure                                                                                                                                                                                                                                                                   | 71                                   | 10.4    | 20.0    | 14.4   | 2.0                   |
| 11                        | Average number of spikelets per bunch                         | Spikelets              | measure                                                                                                                                                                                                                                                                   | 71                                   | 98.5    | 255.8   | 146.3  | 25.2                  |
| 12                        | Average number of fruits per bunch                            | Fn                     | calculation (Fn = aBwt/Fwt)                                                                                                                                                                                                                                               | 71                                   | 819.2   | 2049.8  | 1255.8 | 220.9                 |
| 13                        | Average weight of the fruit (g)                               | Fwt                    | estimation on fruits sample                                                                                                                                                                                                                                               | 71                                   | 5.8     | 10.0    | 7.6    | 1.0                   |
| 14                        | Fruit to bunch ratio (%)                                      | %FB                    | measure                                                                                                                                                                                                                                                                   | 71                                   | 57.9    | 69.2    | 63.8   | 2.3                   |
| 15                        | Pulp to fruit ratio (%)                                       | %PF                    | estimation on fruits sample                                                                                                                                                                                                                                               | 71                                   | 70.2    | 86.5    | 77.6   | 3.1                   |
| 16                        | Palm oil to pulp ratio (%)                                    | %POP                   | estimation on fruits sample                                                                                                                                                                                                                                               | 71                                   | 47.6    | 59.0    | 54.7   | 2.5                   |
| 17                        | Palm oil industrial extraction rate (%)                       | IER                    | calculation (IER = 0.855 x %FB x %PF x %POP/10000)                                                                                                                                                                                                                        | 71                                   | 17.6    | 27.4    | 23.0   | 2.1                   |
| 18                        | Kernel to fruit ratio (%)                                     | %KF                    | estimation on fruits sample                                                                                                                                                                                                                                               | 71                                   | 6.1     | 13.3    | 9.5    | 1.4                   |
| <b>Vegetative growth:</b> |                                                               |                        | <b>Systematic</b>                                                                                                                                                                                                                                                         |                                      |         |         |        |                       |
| 19                        | Stem height (m)                                               | Ht                     | 1 measure at 15 years old, at the level of the Leaf 33                                                                                                                                                                                                                    | 71                                   | 541.6   | 821.7   | 654.5  | 62.4                  |
| 20                        | Average number of leaves per crown                            | L17_L                  | 6 measures at 15 years old                                                                                                                                                                                                                                                | 71                                   | 553.5   | 716.5   | 634.0  | 34.0                  |
| 21                        | Average length of the leaf L17 (cm)                           | P_W                    | 6 measures at 15 years old                                                                                                                                                                                                                                                | 71                                   | 7.6     | 11.0    | 9.1    | 0.7                   |
| 22                        | Petiole average width of the leaf L17 (cm)                    | P_T                    | 6 measures at 15 years old                                                                                                                                                                                                                                                | 71                                   | 3.6     | 5.5     | 4.7    | 0.4                   |
| 23                        | Petiole average thickness of the leaf L17 (cm)                | Leaf_n                 | 6 measures at 15 years old                                                                                                                                                                                                                                                | 71                                   | 22.9    | 44.4    | 34.0   | 4.2                   |
| 24                        | Average number of leaflets per leaf L17                       | Lt_n                   | 6 measures at 15 years old                                                                                                                                                                                                                                                | 71                                   | 154.3   | 196.2   | 170.9  | 8.7                   |
| 25                        | Leaflet average length of the leaf L17 (cm)                   | Lt_L                   | 6 measures at 15 years old                                                                                                                                                                                                                                                | 71                                   | 90.9    | 121.5   | 104.5  | 6.6                   |
| 26                        | Leaflet average width of the leaf L17 (cm)                    | Lt_W                   | 6 measures at 15 years old                                                                                                                                                                                                                                                | 71                                   | 5.4     | 7.5     | 6.4    | 0.5                   |
| <b>Palm Oil quality:</b>  |                                                               |                        | <b>Measure (from 2 bunches analysed per palm)</b>                                                                                                                                                                                                                         |                                      |         |         |        |                       |
| 27                        | % Myristic acid (C14:0)                                       | Myristic acid_C14:0    | Fatty acids extracted by a standard procedure and converted into fatty acid methyl esters. (FAMES) and FAME analyzed by gas chromatography (GC) according to the AFNOR method NF T60-233/1977 (AFNOR, 1977) using Tchobo et al. (2007) protocol with minor modifications. | 71                                   | 0.3     | 1.0     | 0.5    | 0.2                   |
| 28                        | % Palmitic acid (C16:0)                                       | Palmitic acid_C16:0    |                                                                                                                                                                                                                                                                           | 71                                   | 35.2    | 49.7    | 40.9   | 3.0                   |
| 29                        | % Palmitoleic acid (C16:1)                                    | Palmitoleic acid_C16:1 |                                                                                                                                                                                                                                                                           | 71                                   | 0.1     | 0.2     | 0.1    | 0.0                   |
| 30                        | % Stearic acid (C18:0)                                        | Stearic acid_C18:0     |                                                                                                                                                                                                                                                                           | 71                                   | 3.8     | 7.0     | 5.1    | 0.8                   |
| 31                        | % Oleic acid (C18:1)                                          | Oleic acid_C18:1       |                                                                                                                                                                                                                                                                           | 71                                   | 35.4    | 48.9    | 43.3   | 2.8                   |
| 32                        | % Linoleic acid (C18:2)                                       | Linoleic acid_C18:2    |                                                                                                                                                                                                                                                                           | 71                                   | 6.9     | 12.1    | 9.3    | 0.9                   |
| 33                        | % Linolenic acid (C18:3)                                      | Linolenic acid_C18:3   |                                                                                                                                                                                                                                                                           | 71                                   | 0.2     | 0.4     | 0.2    | 0.1                   |
| 34                        | % Arachidic acid (C20:0)                                      | Arachidic acid_C20:0   |                                                                                                                                                                                                                                                                           | 71                                   | 0.2     | 0.5     | 0.4    | 0.1                   |
| 35                        | % Godoleic acid (C20:1)                                       | Gadoleic acid_C20:1    |                                                                                                                                                                                                                                                                           | 71                                   | 0.1     | 0.4     | 0.1    | 0.0                   |
| 36                        | % Saturated                                                   | Saturated              |                                                                                                                                                                                                                                                                           | calculation                          | 71      | 41.7    | 54.5   | 46.9                  |
| 37                        | % Monounsaturated                                             | Monounsaturated        | calculation                                                                                                                                                                                                                                                               | 71                                   | 27.2    | 49.1    | 43.3   | 3.4                   |
| 38                        | % Polyunsaturated                                             | Polyunsaturated        | calculation                                                                                                                                                                                                                                                               | 71                                   | 7.1     | 26.1    | 9.8    | 2.2                   |
| 39                        | Ratio 16:0/18:1                                               | 16:0/18:1              | calculation                                                                                                                                                                                                                                                               | 71                                   | 0.7     | 1.4     | 1.0    | 0.1                   |
| 40                        | Ratio 18:1/16:0                                               | 18:1/16:0              | calculation                                                                                                                                                                                                                                                               | 71                                   | 0.7     | 1.4     | 1.1    | 0.1                   |
| 41                        | Iodine value (proportion of unsaturated fatty acids)          | IV                     | Wijs method described in the ISO 3961:2009 standard                                                                                                                                                                                                                       | 71                                   | 49.4    | 58.9    | 54.7   | 1.9                   |
