# Supplementary material for: Genetic Architecture of Palm Oil Fatty Acid Composition in Cultivated Oil Palm (Elaeis guineensis Jacq.) Compared to Its Wild Relative E. oleifera (H.B.K) Cortés
Source: PubMed Central journal article supplement (PMC4015976; doi:10.1371/journal.pone.0095412), 2014-05-09
Supplement: pone.0095412.s004.pdf [file pone.0095412.s004.pdf]

**Table S2:** Pearson's correlations between phenotypic traits and palm oil composition traits in LM2T x DA10D (n=71).

Correlation matrix (Pearson) - Part 1:

| Variables            | Production        |               |               |              |               |               |               |              | Bunch Components |               |               |               |               |               |               |               |               |               |
|----------------------|-------------------|---------------|---------------|--------------|---------------|---------------|---------------|--------------|------------------|---------------|---------------|---------------|---------------|---------------|---------------|---------------|---------------|---------------|
|                      | Bn3_5             | Bwt3_5        | FFB3_5        | PO3_5        | Bn6_9         | Bwt6_9        | FFB6_9        | PO6_9        | aBwt             | Spikelets     | Fn            | Fwt           | %FB           | %PF           | %POP          | IER           | %KF           |               |
| Production           | Bn3_5             | <b>1</b>      | -0.108        | <b>0.488</b> | <b>0.314</b>  | <b>0.488</b>  | -0.135        | <b>0.444</b> | <b>0.278</b>     | -0.110        | 0.005         | -0.080        | -0.056        | -0.054        | -0.081        | -0.112        | -0.066        | 0.057         |
|                      | Bwt3_5            | -0.108        | <b>1</b>      | <b>0.775</b> | <b>0.607</b>  | <b>-0.302</b> | <b>0.607</b>  | <b>0.266</b> | <b>0.238</b>     | <b>0.395</b>  | <b>0.237</b>  | 0.129         | <b>0.300</b>  | 0.106         | 0.031         | -0.016        | 0.029         | 0.000         |
|                      | FFB3_5            | <b>0.488</b>  | <b>0.775</b>  | <b>1</b>     | <b>0.773</b>  | 0.118         | <b>0.373</b>  | <b>0.526</b> | <b>0.428</b>     | <b>0.282</b>  | 0.210         | 0.051         | <b>0.261</b>  | 0.098         | 0.014         | -0.035        | 0.047         | 0.020         |
|                      | PO3_5             | <b>0.314</b>  | <b>0.607</b>  | <b>0.773</b> | <b>1</b>      | 0.084         | <b>0.304</b>  | <b>0.405</b> | <b>0.736</b>     | <b>0.398</b>  | <b>0.265</b>  | 0.176         | <b>0.302</b>  | <b>0.322</b>  | <b>0.358</b>  | <b>0.414</b>  | <b>0.654</b>  | <b>-0.238</b> |
|                      | Bn6_9             | <b>0.488</b>  | <b>-0.302</b> | 0.118        | 0.084         | <b>1</b>      | <b>-0.478</b> | <b>0.609</b> | <b>0.450</b>     | <b>-0.497</b> | <b>-0.284</b> | <b>-0.392</b> | -0.006        | 0.068         | 0.061         | 0.047         | 0.021         | -0.029        |
|                      | Bwt6_9            | -0.135        | <b>0.607</b>  | <b>0.373</b> | <b>0.304</b>  | <b>-0.478</b> | <b>1</b>      | <b>0.362</b> | <b>0.304</b>     | <b>0.525</b>  | <b>0.378</b>  | <b>0.311</b>  | 0.195         | 0.006         | -0.036        | 0.013         | 0.006         | 0.026         |
|                      | FFB6_9            | <b>0.444</b>  | <b>0.266</b>  | <b>0.526</b> | <b>0.405</b>  | <b>0.609</b>  | <b>0.362</b>  | <b>1</b>     | <b>0.760</b>     | -0.066        | 0.051         | -0.183        | 0.219         | 0.029         | 0.034         | 0.069         | 0.016         | 0.002         |
|                      | PO6_9             | <b>0.278</b>  | <b>0.238</b>  | <b>0.428</b> | <b>0.736</b>  | <b>0.450</b>  | <b>0.304</b>  | <b>0.760</b> | <b>1</b>         | 0.143         | 0.143         | 0.006         | <b>0.267</b>  | <b>0.295</b>  | <b>0.403</b>  | <b>0.502</b>  | <b>0.650</b>  | <b>-0.271</b> |
|                      | aBwt              | -0.110        | <b>0.395</b>  | <b>0.282</b> | <b>0.398</b>  | <b>-0.497</b> | <b>0.525</b>  | -0.066       | 0.143            | <b>1</b>      | <b>0.678</b>  | <b>0.749</b>  | <b>0.275</b>  | <b>0.406</b>  | 0.079         | 0.029         | <b>0.286</b>  | -0.100        |
| Bunch Components     | Spikelets         | 0.005         | <b>0.237</b>  | 0.210        | <b>0.265</b>  | <b>-0.284</b> | <b>0.378</b>  | 0.051        | 0.143            | <b>0.678</b>  | <b>1</b>      | <b>0.618</b>  | 0.115         | <b>0.271</b>  | 0.029         | -0.079        | 0.149         | -0.147        |
|                      | Fn                | -0.080        | 0.129         | 0.051        | 0.176         | <b>-0.392</b> | <b>0.311</b>  | -0.183       | 0.006            | <b>0.749</b>  | <b>0.618</b>  | <b>1</b>      | <b>-0.358</b> | <b>0.482</b>  | 0.045         | -0.047        | <b>0.242</b>  | -0.143        |
|                      | Fwt               | -0.056        | <b>0.300</b>  | <b>0.261</b> | <b>0.302</b>  | -0.006        | 0.195         | 0.219        | <b>0.267</b>     | <b>0.275</b>  | 0.115         | <b>-0.358</b> | <b>1</b>      | 0.064         | 0.065         | 0.106         | 0.117         | 0.022         |
|                      | %FB               | -0.054        | 0.106         | 0.098        | <b>0.322</b>  | 0.068         | 0.006         | 0.029        | <b>0.295</b>     | <b>0.406</b>  | <b>0.271</b>  | <b>0.482</b>  | 0.064         | <b>1</b>      | 0.052         | -0.017        | <b>0.430</b>  | -0.044        |
|                      | %PF               | -0.081        | 0.031         | 0.014        | <b>0.358</b>  | 0.061         | -0.036        | 0.034        | <b>0.403</b>     | 0.079         | 0.029         | 0.045         | 0.065         | 0.052         | <b>1</b>      | <b>0.340</b>  | <b>0.572</b>  | <b>-0.773</b> |
|                      | %POP              | -0.112        | -0.016        | -0.035       | <b>0.414</b>  | 0.047         | 0.013         | 0.069        | <b>0.502</b>     | 0.029         | -0.079        | -0.047        | 0.106         | -0.017        | <b>0.340</b>  | <b>1</b>      | <b>0.718</b>  | -0.213        |
|                      | IER               | -0.066        | 0.029         | 0.047        | <b>0.654</b>  | 0.021         | 0.006         | 0.016        | <b>0.650</b>     | <b>0.286</b>  | 0.149         | <b>0.242</b>  | 0.117         | <b>0.430</b>  | <b>0.572</b>  | <b>0.718</b>  | <b>1</b>      | <b>-0.422</b> |
|                      | %KF               | 0.057         | 0.000         | 0.020        | <b>-0.238</b> | -0.029        | 0.026         | 0.002        | <b>-0.271</b>    | -0.100        | -0.147        | -0.143        | 0.022         | -0.044        | <b>-0.773</b> | -0.213        | <b>-0.422</b> | <b>1</b>      |
|                      | Vegetative growth | Ht            | 0.109         | 0.014        | 0.062         | 0.069         | 0.228         | 0.098        | <b>0.355</b>     | <b>0.294</b>  | 0.113         | 0.169         | 0.047         | 0.126         | 0.126         | 0.144         | -0.091        | 0.035         |
| Leaf_n               |                   | 0.080         | <b>0.298</b>  | <b>0.311</b> | 0.218         | -0.188        | <b>0.255</b>  | 0.047        | 0.011            | <b>0.406</b>  | <b>0.363</b>  | <b>0.316</b>  | 0.057         | 0.068         | -0.171        | -0.082        | -0.041        | 0.073         |
| L17_L                |                   | -0.091        | -0.042        | -0.066       | -0.044        | -0.019        | -0.088        | 0.002        | 0.003            | -0.176        | -0.101        | <b>-0.246</b> | 0.102         | -0.194        | 0.183         | 0.104         | -0.005        | 0.024         |
| P_W                  |                   | -0.123        | 0.193         | 0.059        | 0.037         | -0.105        | <b>0.345</b>  | <b>0.234</b> | 0.162            | 0.228         | 0.121         | 0.026         | <b>0.297</b>  | 0.075         | -0.104        | 0.053         | -0.043        | 0.167         |
| P_T                  |                   | -0.193        | <b>0.278</b>  | 0.099        | 0.176         | -0.123        | <b>0.300</b>  | 0.210        | <b>0.253</b>     | 0.188         | 0.178         | 0.036         | 0.219         | 0.019         | <b>0.262</b>  | 0.173         | 0.125         | -0.135        |
| Lt_n                 |                   | 0.135         | -0.038        | 0.080        | -0.002        | 0.194         | -0.128        | 0.134        | 0.021            | -0.216        | -0.151        | <b>-0.429</b> | <b>0.237</b>  | <b>-0.316</b> | 0.030         | 0.046         | -0.135        | 0.040         |
| Lt_L                 |                   | <b>-0.250</b> | 0.126         | -0.027       | 0.140         | -0.083        | 0.203         | 0.090        | <b>0.249</b>     | <b>0.269</b>  | 0.015         | 0.115         | 0.205         | 0.182         | 0.073         | 0.209         | <b>0.246</b>  | 0.097         |
| Lt_W                 |                   | 0.008         | 0.172         | 0.124        | 0.082         | 0.075         | <b>0.338</b>  | <b>0.403</b> | <b>0.294</b>     | -0.091        | -0.073        | <b>-0.287</b> | <b>0.298</b>  | -0.129        | -0.079        | 0.014         | -0.070        | -0.029        |
| Palm Oil Composition | C14:0             | 0.179         | -0.074        | -0.021       | -0.075        | -0.127        | 0.174         | 0.048        | -0.032           | 0.048         | -0.008        | 0.005         | -0.022        | 0.024         | -0.118        | -0.149        | -0.096        | 0.009         |
|                      | C16:0             | <b>0.277</b>  | -0.003        | 0.088        | -0.035        | -0.036        | 0.077         | 0.085        | -0.035           | -0.093        | -0.067        | -0.199        | 0.101         | -0.071        | -0.086        | -0.131        | -0.131        | -0.012        |
|                      | C16:1             | 0.024         | -0.043        | -0.025       | -0.130        | <b>-0.262</b> | 0.091         | -0.133       | -0.222           | <b>0.244</b>  | <b>0.288</b>  | 0.221         | -0.042        | 0.077         | -0.188        | <b>-0.306</b> | -0.171        | 0.024         |
|                      | C18:0             | <b>-0.249</b> | -0.046        | -0.158       | -0.088        | -0.035        | -0.171        | -0.189       | -0.104           | -0.063        | -0.055        | 0.048         | -0.119        | -0.044        | 0.030         | 0.121         | 0.035         | 0.062         |
|                      | C18:1             | <b>-0.243</b> | 0.018         | -0.071       | 0.051         | 0.023         | -0.036        | -0.065       | 0.050            | 0.076         | 0.026         | 0.192         | -0.120        | 0.148         | 0.101         | 0.078         | 0.131         | 0.016         |
|                      | C18:2             | 0.002         | -0.024        | 0.030        | 0.018         | 0.133         | -0.049        | 0.076        | 0.062            | 0.090         | 0.172         | 0.033         | 0.104         | -0.143        | 0.006         | 0.111         | 0.024         | -0.094        |
|                      | C18:3             | 0.149         | 0.029         | 0.112        | 0.114         | 0.060         | 0.187         | <b>0.291</b> | <b>0.249</b>     | 0.074         | -0.077        | -0.037        | 0.148         | 0.050         | -0.076        | 0.056         | 0.052         | 0.082         |
|                      | C20:0             | <b>-0.263</b> | 0.165         | -0.005       | -0.045        | 0.023         | 0.031         | 0.019        | -0.009           | -0.087        | -0.203        | -0.166        | 0.106         | -0.147        | 0.029         | 0.177         | -0.077        | -0.004        |
|                      | C20:1             | -0.148        | 0.054         | -0.024       | 0.035         | -0.196        | 0.051         | -0.149       | -0.080           | 0.134         | 0.050         | 0.113         | 0.010         | -0.102        | -0.106        | 0.117         | 0.053         | 0.054         |
|                      | IV                | -0.223        | -0.039        | -0.053       | 0.031         | 0.140         | -0.154        | -0.051       | 0.036            | 0.078         | 0.054         | 0.169         | -0.085        | 0.027         | 0.085         | 0.133         | 0.110         | -0.010        |

Values in bold are different from 0 with a significance level  $\alpha=0,05$

Correlation matrix (Pearson) - Part 2:

| Variables            | Vegetative growth |               |              |               |              |              |               |               | Palm Oil Composition |               |               |               |               |               |               |               |               |          |               |
|----------------------|-------------------|---------------|--------------|---------------|--------------|--------------|---------------|---------------|----------------------|---------------|---------------|---------------|---------------|---------------|---------------|---------------|---------------|----------|---------------|
|                      | Ht                | L17_L         | P_W          | P_T           | Leaf_n       | Lt_n         | Lt_L          | Lt_W          | C14:0                | C16:0         | C16:1         | C18:0         | C18:1         | C18:2         | C18:3         | C20:0         | C20:1         | IV       |               |
| Production           | Bn3_5             | 0.109         | 0.080        | -0.091        | -0.123       | -0.193       | 0.135         | <b>-0.250</b> | 0.008                | 0.179         | <b>0.277</b>  | 0.024         | <b>-0.249</b> | <b>-0.243</b> | 0.002         | 0.149         | <b>-0.263</b> | -0.148   | -0.223        |
|                      | Bwt3_5            | 0.014         | <b>0.298</b> | -0.042        | 0.193        | <b>0.278</b> | -0.038        | 0.126         | 0.172                | -0.074        | -0.003        | -0.043        | -0.046        | 0.018         | -0.024        | 0.029         | 0.165         | 0.054    | -0.039        |
|                      | FFB3_5            | 0.062         | <b>0.311</b> | -0.066        | 0.059        | 0.099        | 0.080         | -0.027        | 0.124                | -0.021        | 0.088         | -0.025        | -0.158        | -0.071        | 0.030         | 0.112         | -0.005        | -0.024   | -0.053        |
|                      | PO3_5             | 0.069         | 0.218        | -0.044        | 0.037        | 0.176        | -0.002        | 0.140         | 0.082                | -0.075        | -0.035        | -0.130        | -0.088        | 0.051         | 0.018         | 0.114         | -0.045        | 0.035    | 0.031         |
|                      | Bn6_9             | 0.228         | -0.188       | -0.019        | -0.105       | -0.123       | 0.194         | -0.083        | 0.075                | -0.127        | -0.036        | <b>-0.262</b> | -0.035        | 0.023         | 0.133         | 0.060         | 0.023         | -0.196   | 0.140         |
|                      | Bwt6_9            | 0.098         | <b>0.255</b> | -0.088        | <b>0.345</b> | <b>0.300</b> | -0.128        | 0.203         | <b>0.338</b>         | 0.174         | 0.077         | 0.091         | -0.171        | -0.036        | -0.049        | 0.187         | 0.031         | 0.051    | -0.154        |
|                      | FFB6_9            | <b>0.355</b>  | 0.047        | 0.002         | <b>0.234</b> | 0.210        | 0.134         | 0.090         | <b>0.403</b>         | 0.048         | 0.085         | -0.133        | -0.189        | -0.065        | 0.076         | <b>0.291</b>  | 0.019         | -0.149   | -0.051        |
|                      | PO6_9             | <b>0.294</b>  | 0.011        | 0.003         | 0.162        | <b>0.253</b> | 0.021         | <b>0.249</b>  | <b>0.294</b>         | -0.032        | -0.035        | -0.222        | -0.104        | 0.050         | 0.062         | <b>0.249</b>  | -0.009        | -0.080   | 0.036         |
|                      | Bunch Components  | aBwt          | 0.113        | <b>0.406</b>  | -0.176       | 0.228        | 0.188         | -0.216        | <b>0.269</b>         | -0.091        | 0.048         | -0.093        | <b>0.244</b>  | -0.063        | 0.076         | 0.090         | 0.074         | -0.087   | 0.134         |
| Spikelets            |                   | 0.169         | <b>0.363</b> | -0.101        | 0.121        | 0.178        | -0.151        | 0.015         | -0.073               | -0.008        | -0.067        | <b>0.288</b>  | -0.055        | 0.026         | 0.172         | -0.077        | -0.203        | 0.050    | 0.054         |
| Fn                   |                   | 0.047         | <b>0.316</b> | <b>-0.246</b> | 0.026        | 0.036        | <b>-0.429</b> | 0.115         | <b>-0.287</b>        | 0.005         | -0.199        | 0.221         | 0.048         | 0.192         | 0.033         | -0.037        | -0.166        | 0.113    | 0.169         |
| Fwt                  |                   | 0.126         | 0.057        | 0.102         | <b>0.297</b> | 0.219        | <b>0.237</b>  | 0.205         | <b>0.298</b>         | -0.022        | 0.101         | -0.042        | -0.119        | -0.120        | 0.104         | 0.148         | 0.106         | 0.010    | -0.085        |
| %FB                  |                   | 0.126         | 0.068        | -0.194        | 0.075        | 0.019        | <b>-0.316</b> | 0.182         | -0.129               | 0.024         | -0.071        | 0.077         | -0.044        | 0.148         | -0.143        | 0.050         | -0.147        | -0.102   | 0.027         |
| %PF                  |                   | 0.144         | -0.171       | 0.183         | -0.104       | <b>0.262</b> | 0.030         | 0.073         | -0.079               | -0.118        | -0.086        | -0.188        | 0.030         | 0.101         | 0.006         | -0.076        | 0.029         | -0.106   | 0.085         |
| %POP                 |                   | -0.091        | -0.082       | 0.104         | 0.053        | 0.173        | 0.046         | 0.209         | 0.014                | -0.149        | -0.131        | <b>-0.306</b> | 0.121         | 0.078         | 0.111         | 0.056         | 0.177         | 0.117    | 0.133         |
| IER                  |                   | 0.035         | -0.041       | -0.005        | -0.043       | 0.125        | -0.135        | <b>0.246</b>  | -0.070               | -0.096        | -0.131        | -0.171        | 0.035         | 0.131         | 0.024         | 0.052         | -0.077        | 0.053    | 0.110         |
| %KF                  |                   | <b>-0.281</b> | 0.073        | 0.024         | 0.167        | -0.135       | 0.040         | 0.097         | -0.029               | 0.009         | -0.012        | 0.024         | 0.062         | 0.016         | -0.094        | 0.082         | -0.004        | 0.054    | -0.010        |
| Vegetative growth    | Ht                | <b>1</b>      | 0.175        | <b>-0.316</b> | 0.148        | 0.232        | -0.059        | -0.011        | <b>0.372</b>         | 0.086         | -0.011        | -0.036        | 0.007         | 0.007         | -0.005        | -0.007        | 0.130         | 0.048    | -0.023        |
|                      | Leaf_n            | 0.175         | <b>1</b>     | -0.180        | 0.085        | -0.005       | -0.056        | -0.036        | -0.005               | 0.029         | -0.038        | 0.101         | 0.011         | -0.025        | 0.143         | 0.101         | -0.073        | 0.106    | 0.022         |
|                      | L17_L             | <b>-0.316</b> | -0.180       | <b>1</b>      | <b>0.262</b> | <b>0.400</b> | <b>0.345</b>  | 0.109         | -0.006               | -0.072        | 0.052         | 0.093         | 0.097         | -0.086        | 0.024         | 0.126         | -0.020        | -0.024   | 0.019         |
|                      | P_W               | 0.148         | 0.085        | <b>0.262</b>  | <b>1</b>     | <b>0.625</b> | 0.186         | <b>0.254</b>  | <b>0.340</b>         | 0.104         | 0.142         | 0.225         | -0.060        | -0.086        | -0.169        | <b>0.393</b>  | -0.061        | -0.045   | -0.188        |
|                      | P_T               | 0.232         | -0.005       | <b>0.400</b>  | <b>0.625</b> | <b>1</b>     | 0.113         | 0.107         | <b>0.276</b>         | -0.186        | -0.073        | 0.075         | 0.134         | 0.097         | -0.105        | 0.115         | 0.002         | -0.053   | -0.022        |
|                      | Lt_n              | -0.059        | -0.056       | <b>0.345</b>  | 0.186        | 0.113        | <b>1</b>      | 0.023         | 0.097                | 0.110         | <b>0.259</b>  | 0.043         | <b>-0.280</b> | <b>-0.241</b> | 0.081         | 0.076         | 0.031         | 0.115    | -0.103        |
|                      | Lt_L              | -0.011        | -0.036       | 0.109         | <b>0.254</b> | 0.107        | 0.023         | <b>1</b>      | -0.039               | -0.022        | -0.122        | -0.123        | 0.101         | 0.089         | 0.029         | 0.175         | 0.182         | 0.105    | 0.137         |
|                      | Lt_W              | <b>0.372</b>  | -0.005       | -0.006        | <b>0.340</b> | <b>0.276</b> | 0.097         | -0.039        | <b>1</b>             | 0.065         | 0.158         | 0.025         | -0.146        | -0.095        | -0.143        | <b>0.264</b>  | 0.097         | 0.002    | -0.192        |
| Palm Oil Composition | C14:0             | 0.086         | 0.029        | -0.072        | 0.104        | -0.186       | 0.110         | -0.022        | 0.065                | <b>1</b>      | <b>0.733</b>  | <b>0.391</b>  | <b>-0.604</b> | <b>-0.727</b> | 0.126         | <b>0.381</b>  | <b>-0.398</b> | -0.109   | <b>-0.642</b> |
|                      | C16:0             | -0.011        | -0.038       | 0.052         | 0.142        | -0.073       | <b>0.259</b>  | -0.122        | 0.158                | <b>0.733</b>  | <b>1</b>      | <b>0.374</b>  | <b>-0.773</b> | <b>-0.921</b> | 0.058         | 0.205         | <b>-0.429</b> | -0.138   | <b>-0.858</b> |
|                      | C16:1             | -0.036        | 0.101        | 0.093         | 0.225        | 0.075        | 0.043         | -0.123        | 0.025                | <b>0.391</b>  | <b>0.374</b>  | <b>1</b>      | <b>-0.375</b> | <b>-0.379</b> | 0.128         | <b>0.336</b>  | <b>-0.450</b> | 0.020    | <b>-0.247</b> |
|                      | C18:0             | 0.007         | 0.011        | 0.097         | -0.060       | 0.134        | <b>-0.280</b> | 0.101         | -0.146               | <b>-0.604</b> | <b>-0.773</b> | <b>-0.375</b> | <b>1</b>      | <b>0.598</b>  | -0.045        | -0.154        | <b>0.496</b>  | 0.089    | <b>0.553</b>  |
|                      | C18:1             | 0.007         | -0.025       | -0.086        | -0.086       | 0.097        | <b>-0.241</b> | 0.089         | -0.095               | <b>-0.727</b> | <b>-0.921</b> | <b>-0.379</b> | <b>0.598</b>  | <b>1</b>      | <b>-0.387</b> | <b>-0.254</b> | <b>0.340</b>  | 0.129    | <b>0.737</b>  |
|                      | C18:2             | -0.005        | 0.143        | 0.024         | -0.169       | -0.105       | 0.081         | 0.029         | -0.143               | 0.126         | 0.058         | 0.128         | -0.045        | <b>-0.387</b> | <b>1</b>      | 0.089         | -0.014        | -0.120   | 0.220         |
|                      | C18:3             | -0.007        | 0.101        | 0.126         | <b>0.393</b> | 0.115        | 0.076         | 0.175         | <b>0.264</b>         | <b>0.381</b>  | 0.205         | <b>0.336</b>  | -0.154        | <b>-0.254</b> | 0.089         | <b>1</b>      | -0.154        | -0.067   | -0.118        |
|                      | C20:0             | 0.130         | -0.073       | -0.020        | -0.061       | 0.002        | 0.031         | 0.182         | 0.097                | <b>-0.398</b> | <b>-0.429</b> | <b>-0.450</b> | <b>0.496</b>  | <b>0.340</b>  | -0.014        | -0.154        | <b>1</b>      | 0.117    | <b>0.376</b>  |
|                      | C20:1             | 0.048         | 0.106        | -0.024        | -0.045       | -0.053       | 0.115         | 0.105         | 0.002                | -0.109        | -0.138        | 0.020         | 0.089         | 0.129         | -0.120        | -0.067        | 0.117         | <b>1</b> | 0.109         |
|                      | IV                | -0.023        | 0.022        | 0.019         | -0.188       | -0.022       | -0.103        | 0.137         | -0.192               | <b>-0.642</b> | <b>-0.858</b> | <b>-0.247</b> | <b>0.553</b>  | <b>0.737</b>  | 0.220         | -0.118        | <b>0.376</b>  | 0.109    | <b>1</b>      |

Values in bold are different from 0 with a significance level  $\alpha=0,05$
